# Supplementary material for: Functional study of the association of CHI3L1 polymorphisms with asthma susceptibility in the Southwest Chinese Han population
Source: Oxford University Press journal article supplement (doi:10.1042/bsr20182008), 2019-04-15
Supplement: bsr-2018-2008_supp.pdf [file bsr-2018-2008_supp.pdf]

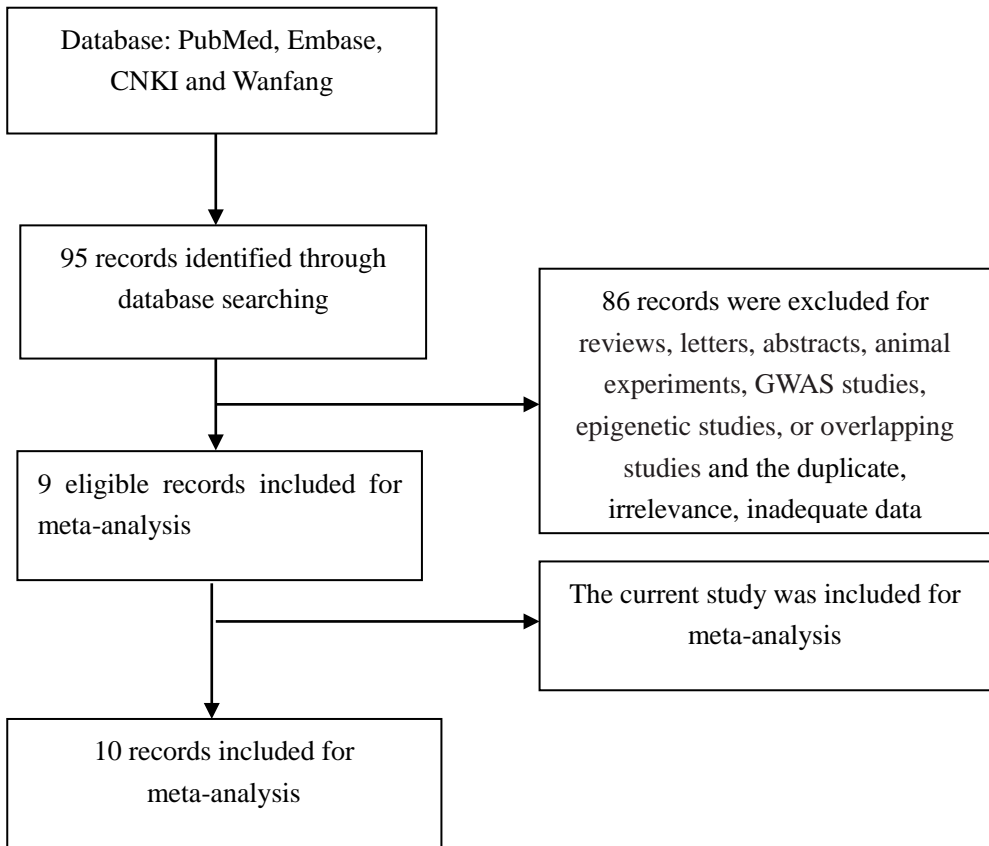

Figure S1 Flowchart of the literature search

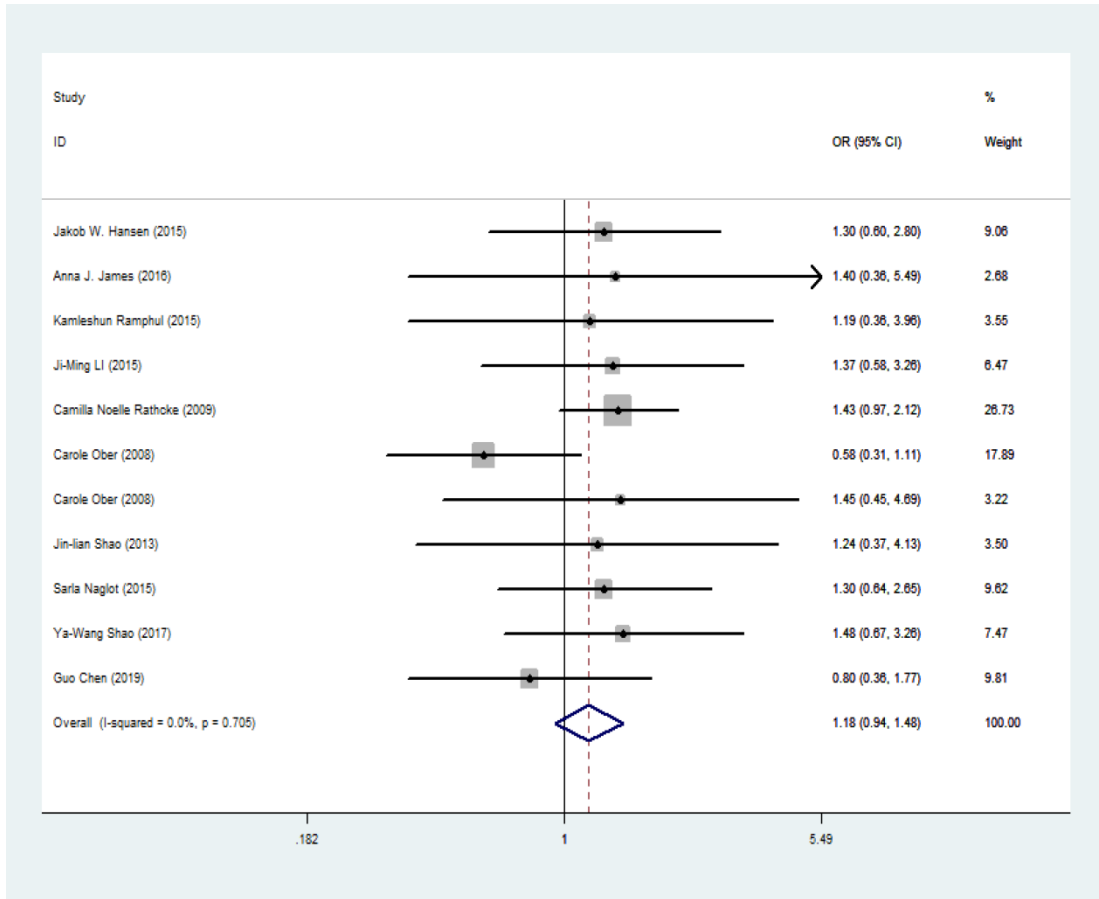

a

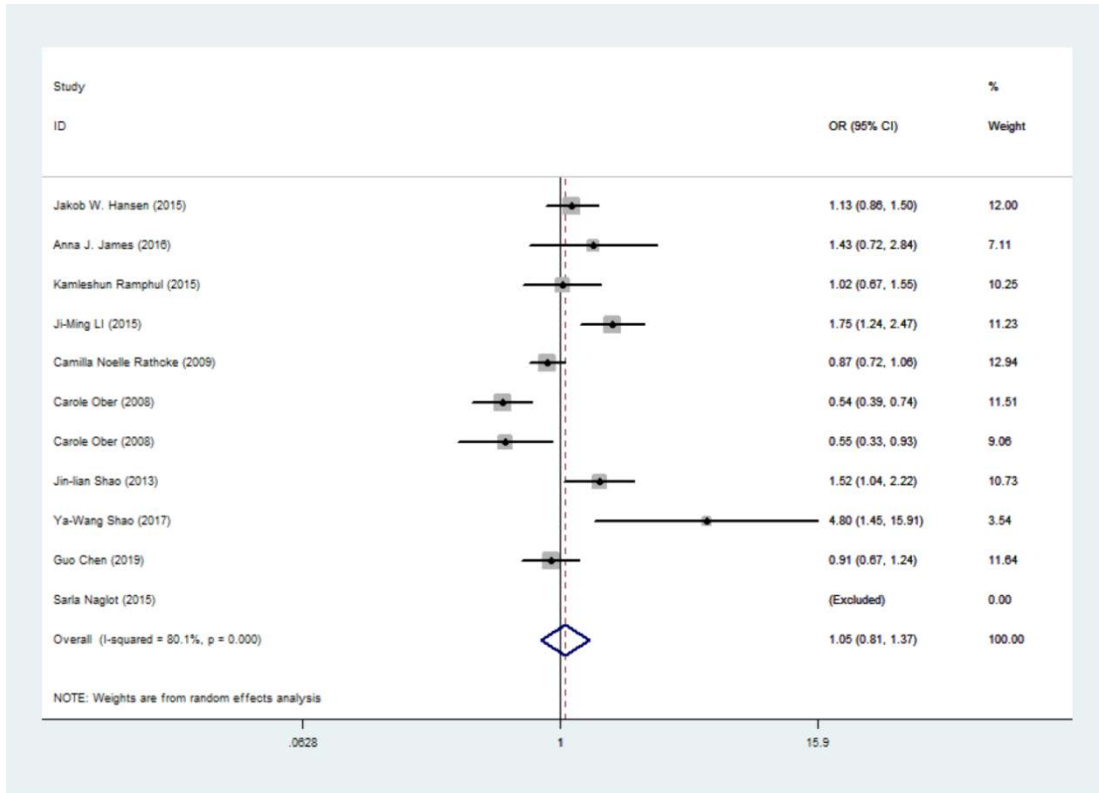

b

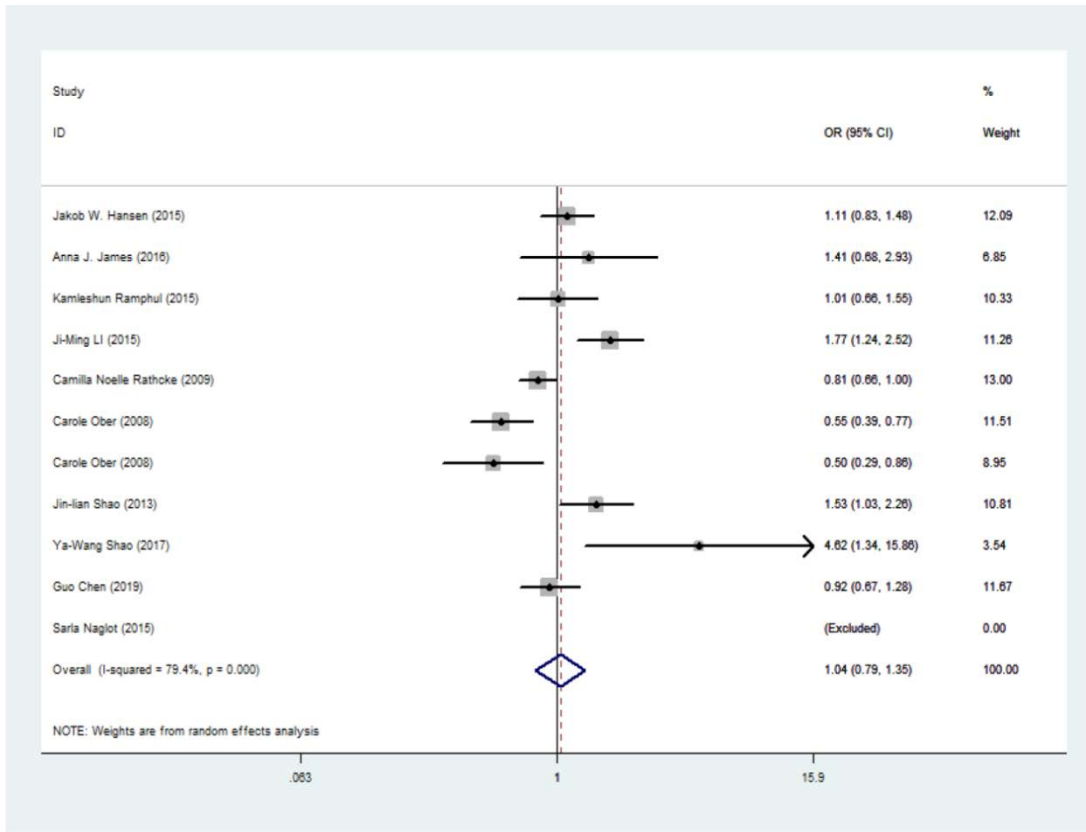

c

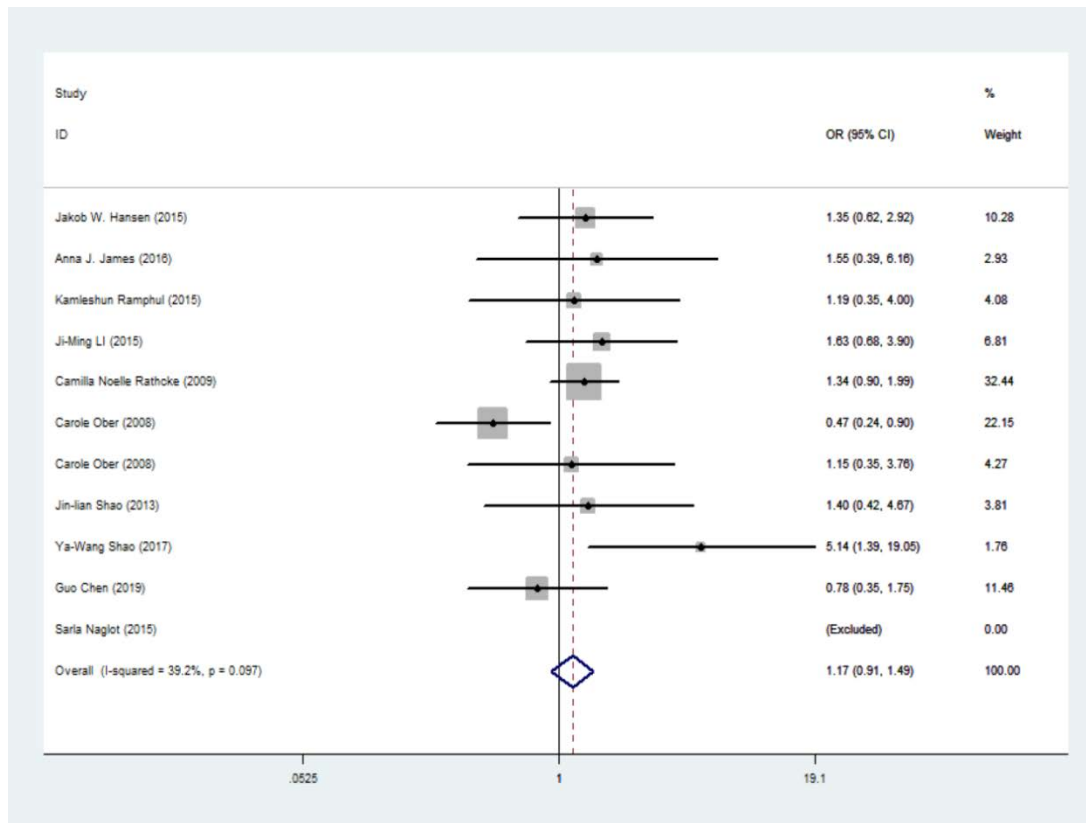

d

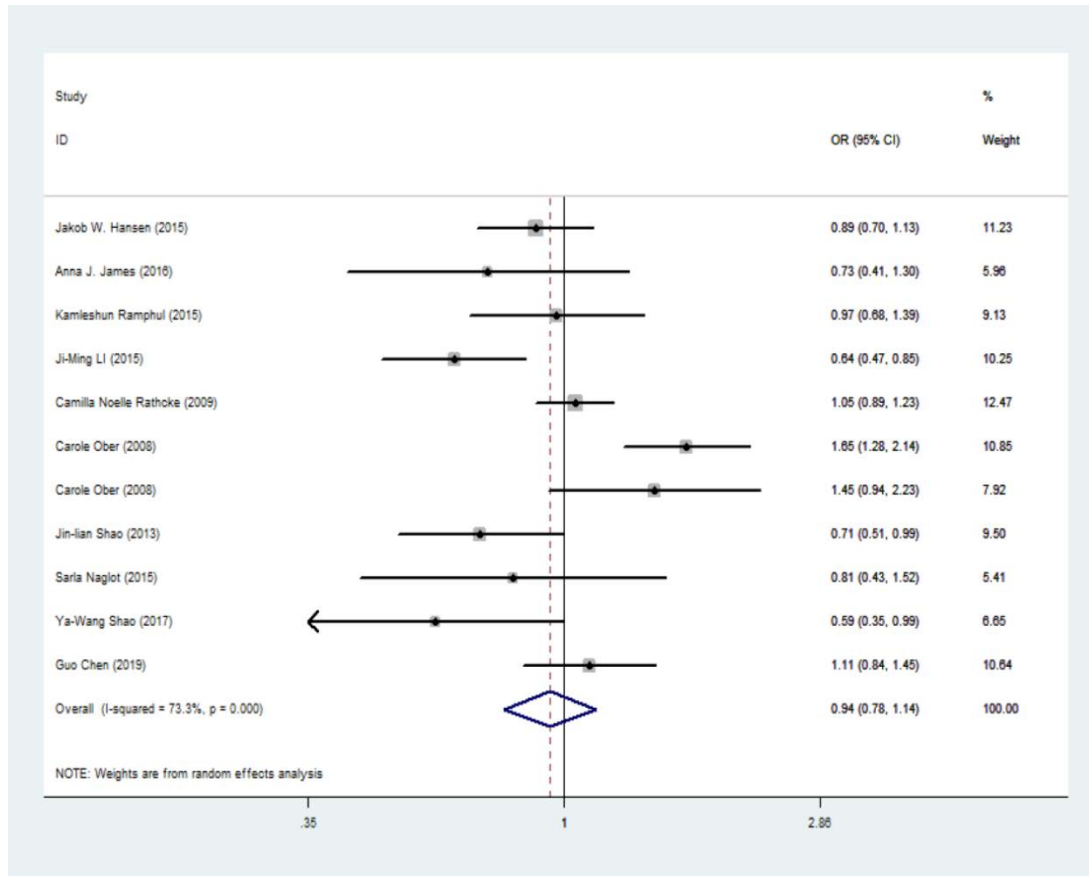

e

Figure S2 Forest plot of the association between *CH13L1* rs4950928 and asthma under different models. a, the recessive model; b, dominant model; c, codominant (GC vs. CC); d, codominant (GG vs. CC); e, allele model.

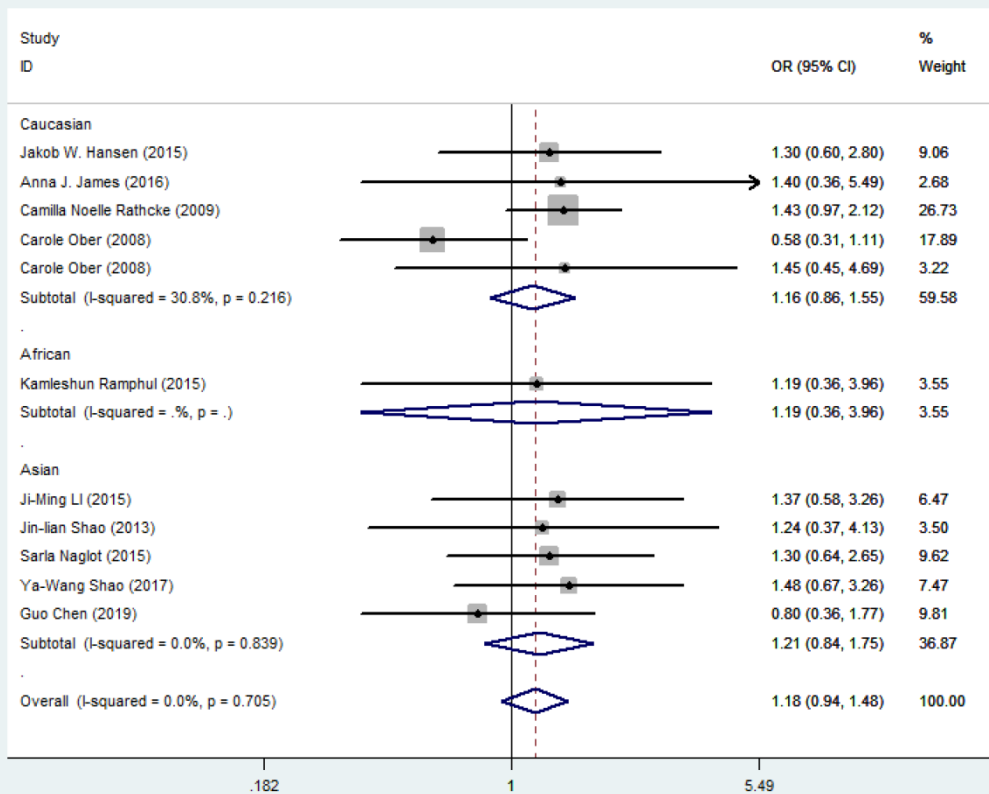

**a**

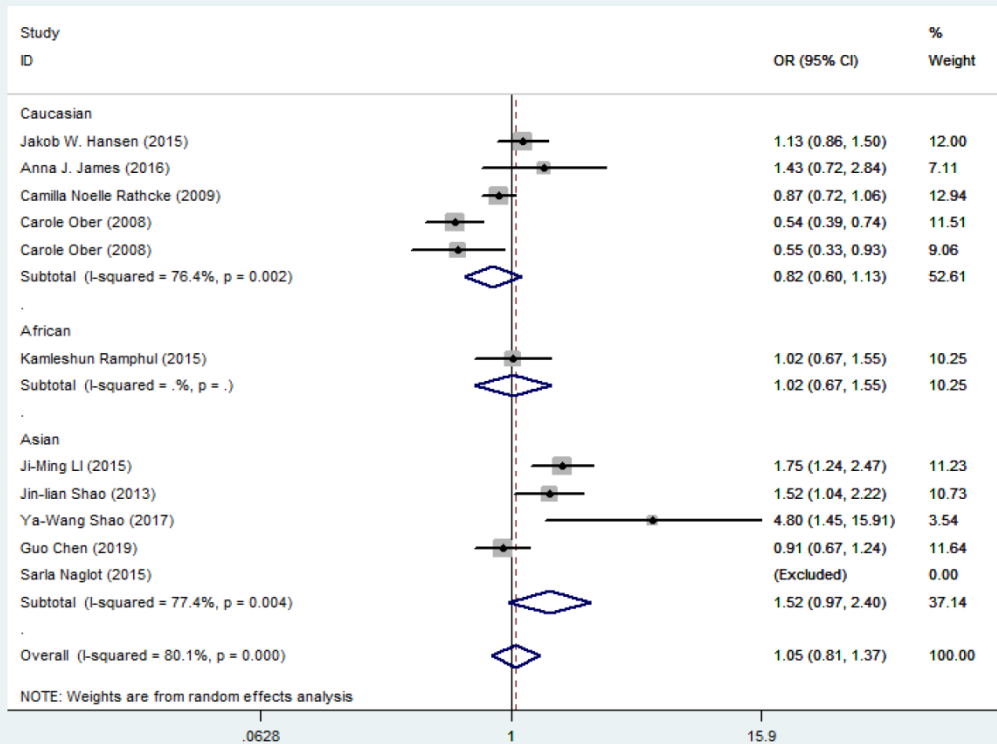

**b**

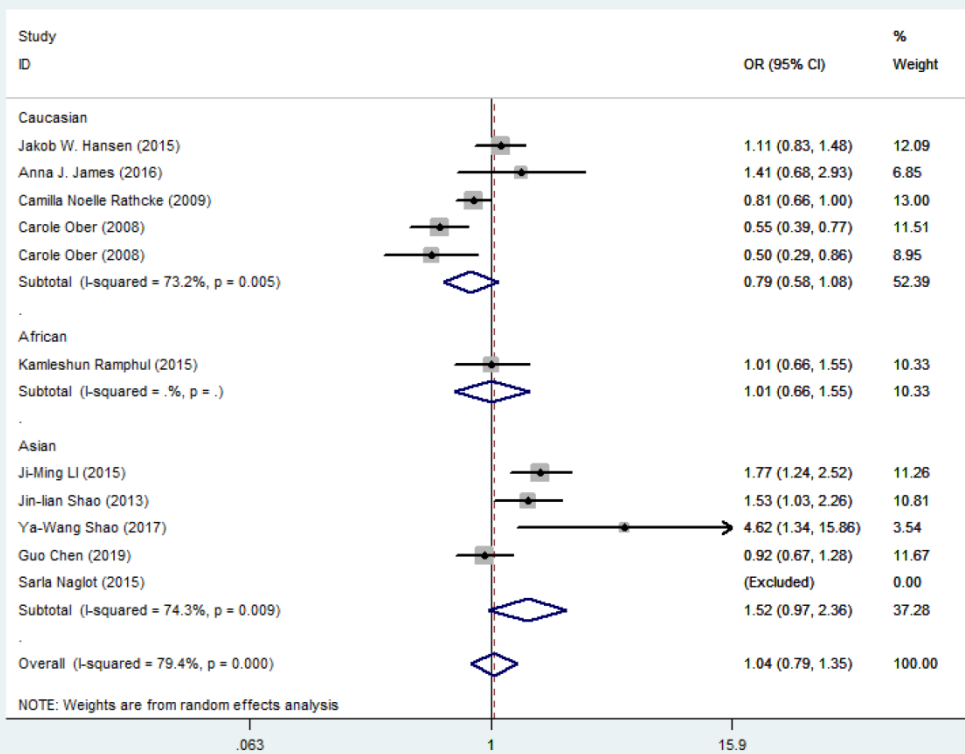

c

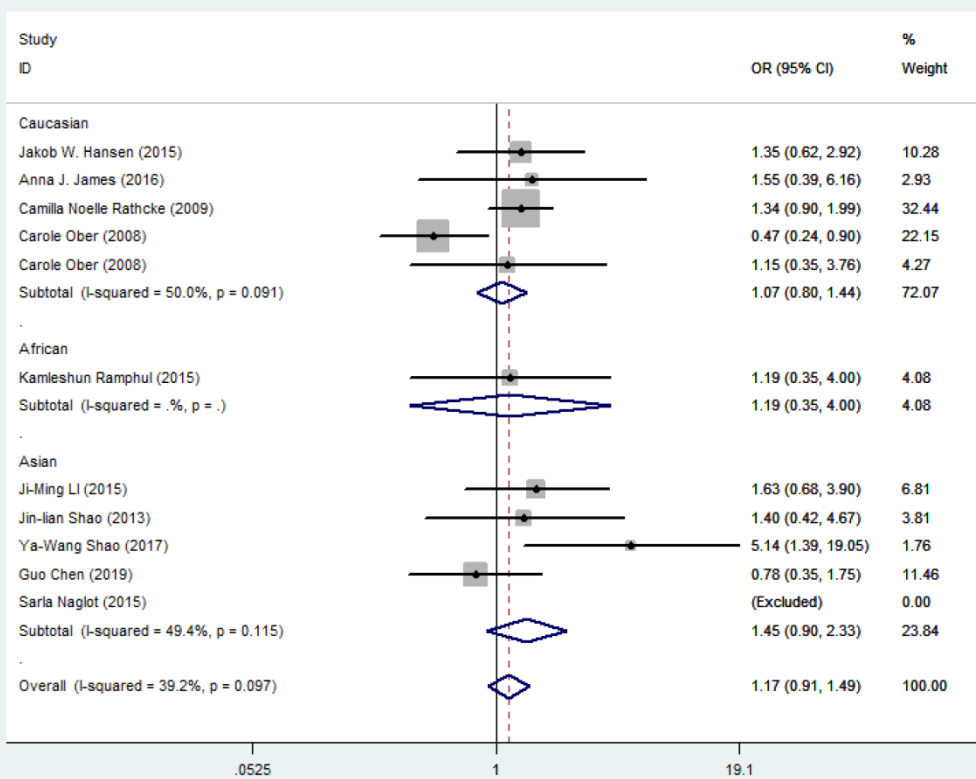

d

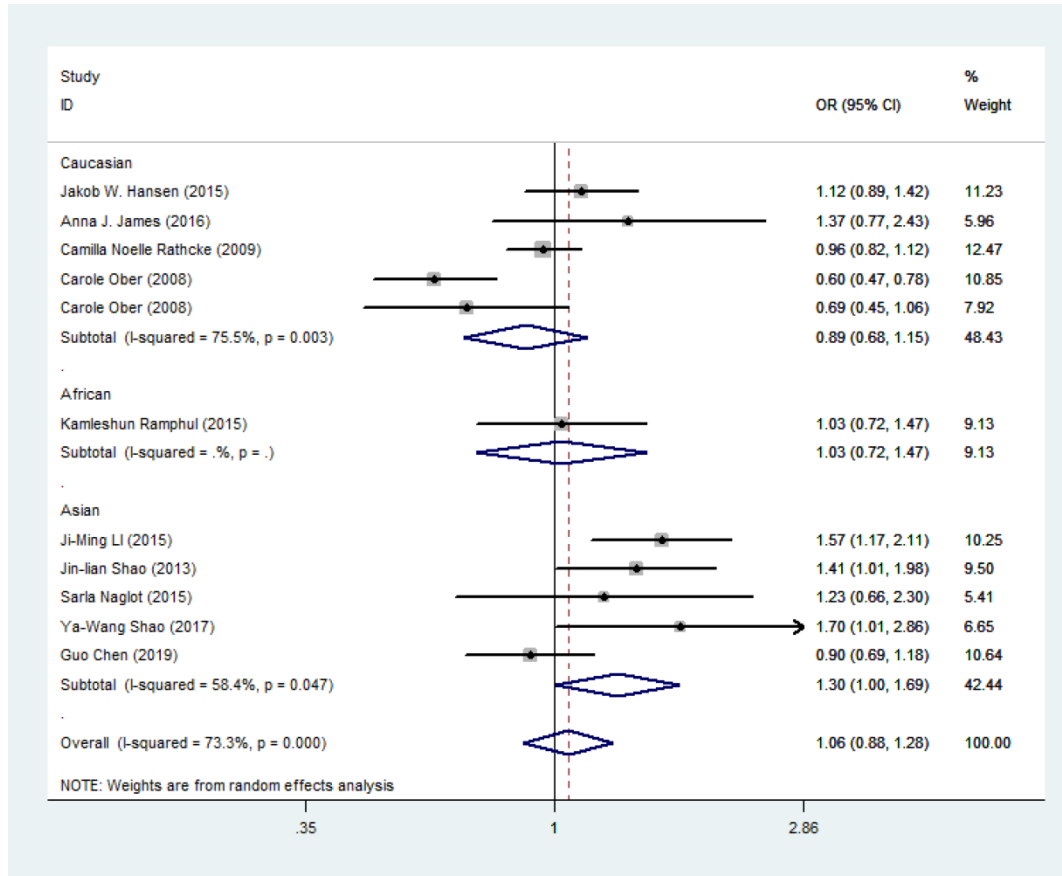

e

Figure S3 Forest plot of the association between *CHI3LI* rs4950928 and asthma by ethnicity stratification under different models. a, the recessive model; b, dominant model; c, codominant (GC vs. CC); d, codominant (GG vs. CC); e, allele model.

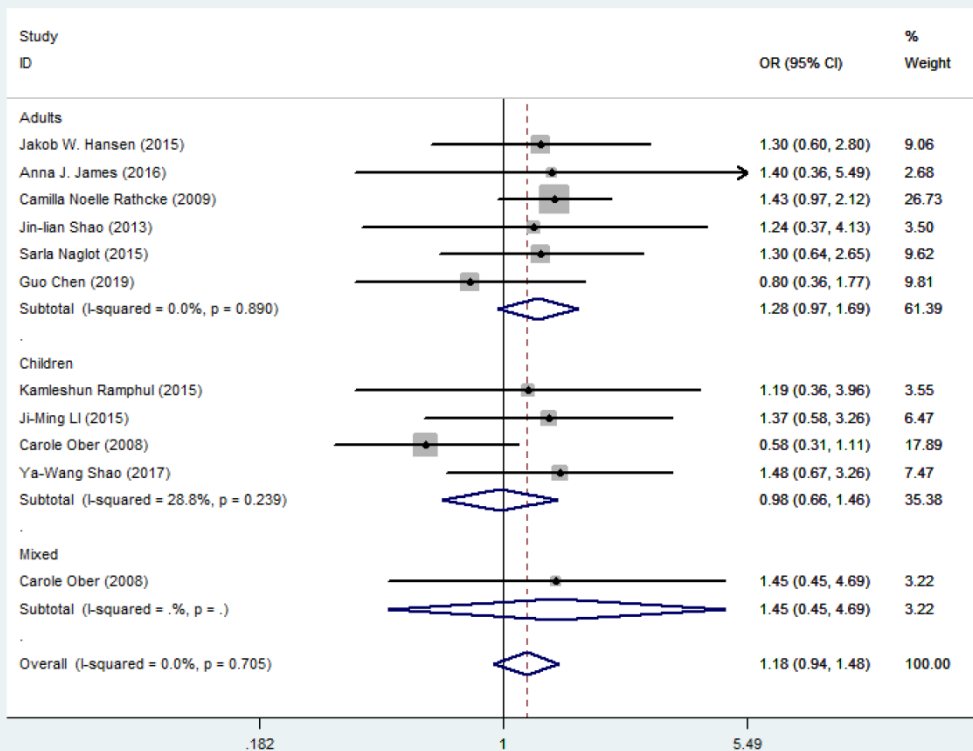

a

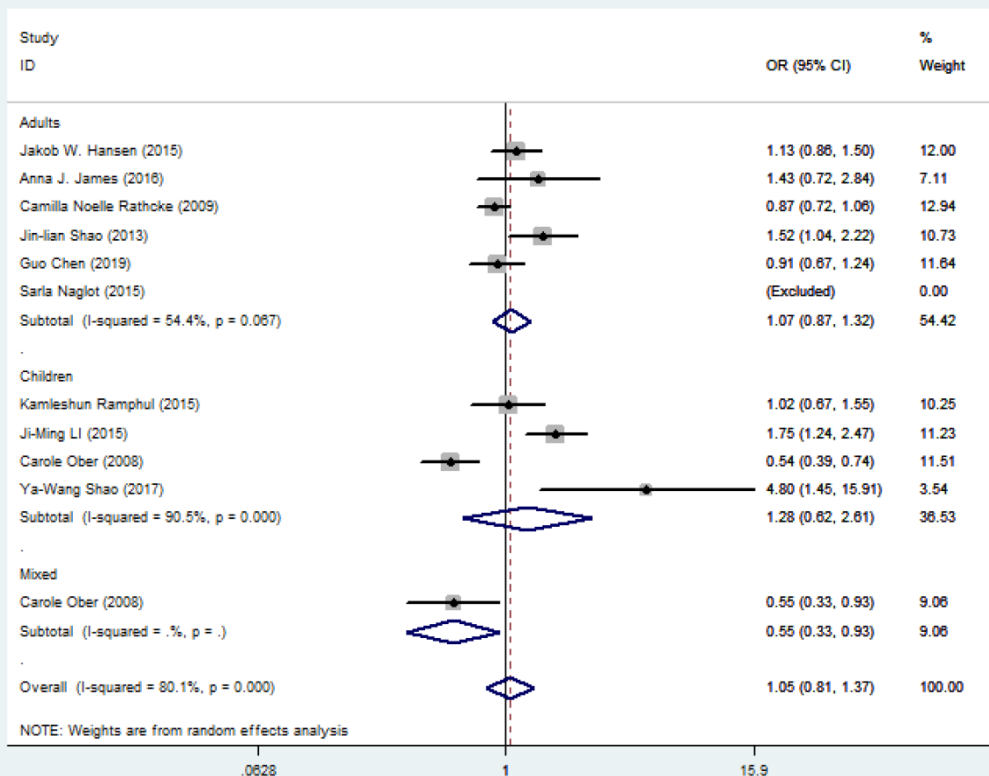

b



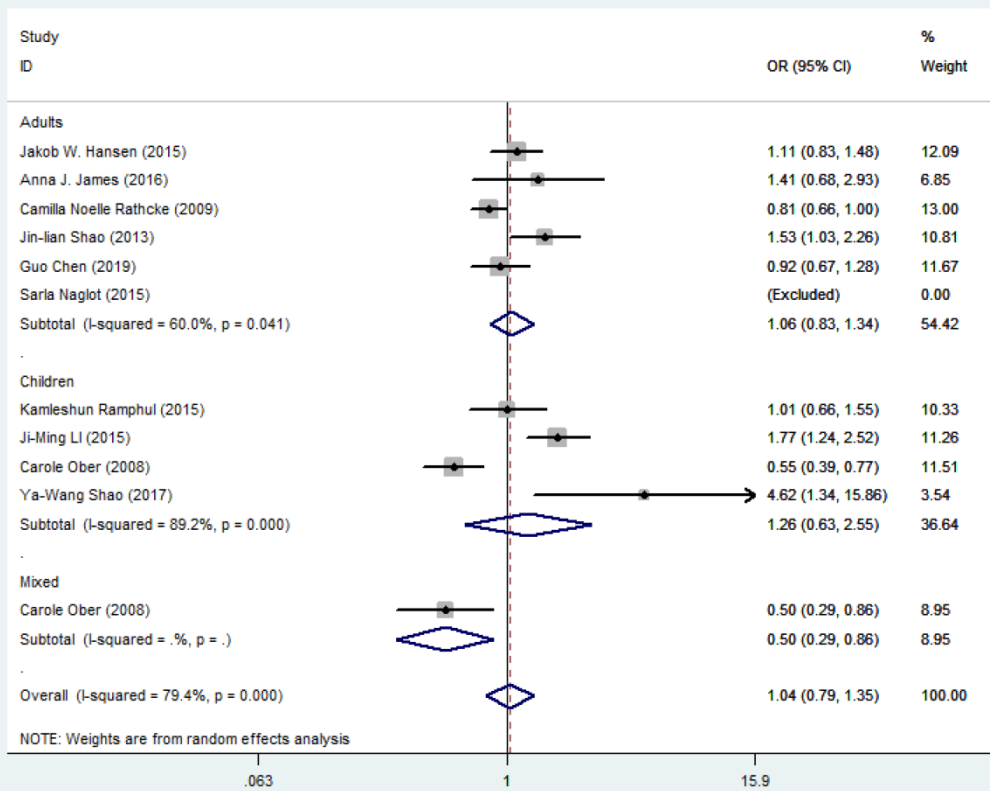

C

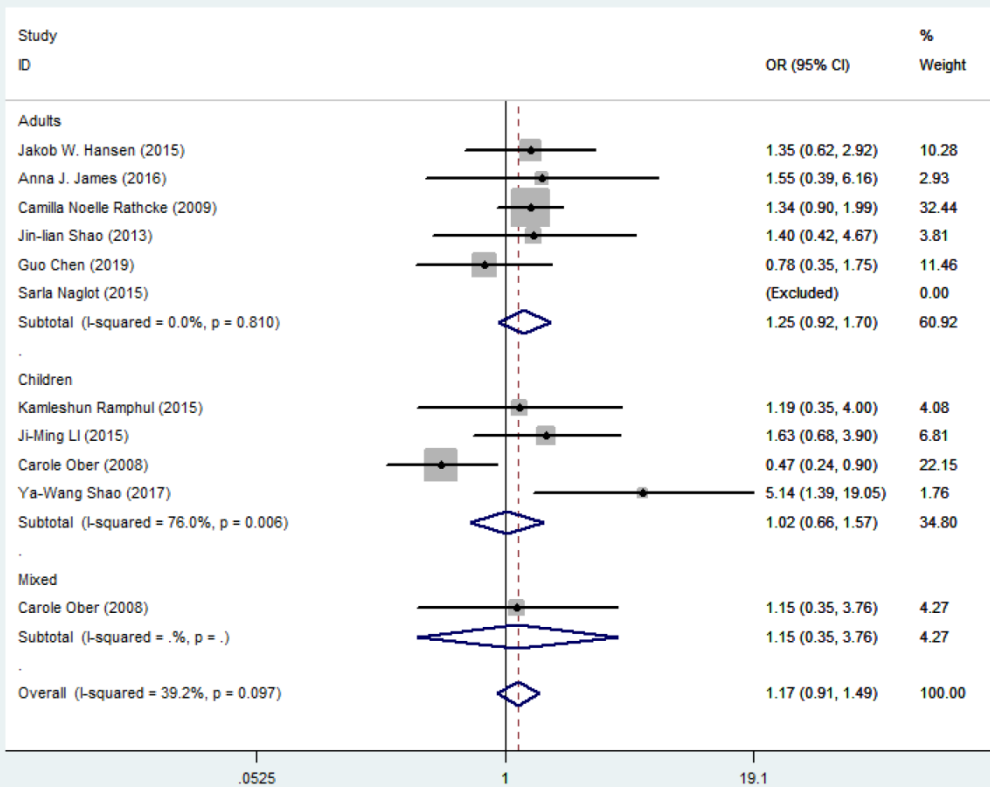

d

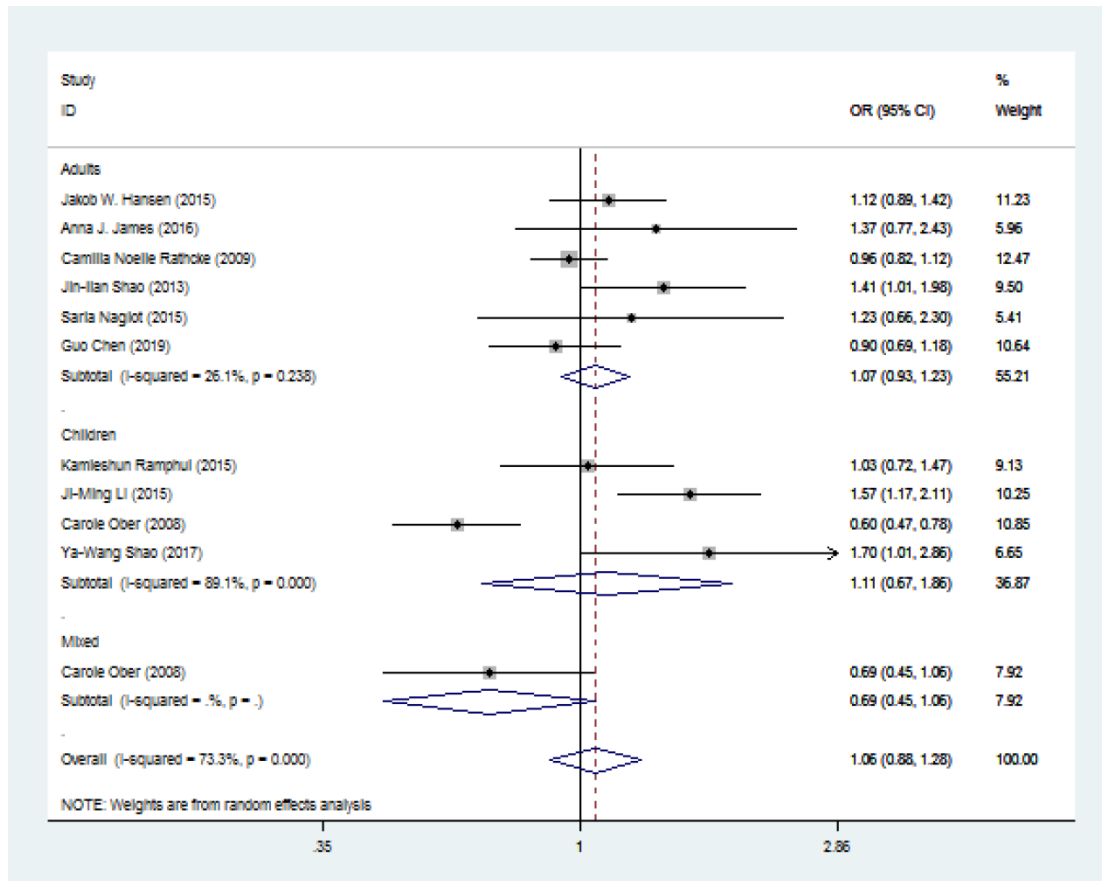

e

Figure S4 Forest plot of the association between *CHI3L1* rs4950928 and asthma by age stratification under different models. a, the recessive model; b, dominant model; c, codominant (GC vs. CC); d, codominant (GG vs. CC); e, allele model.

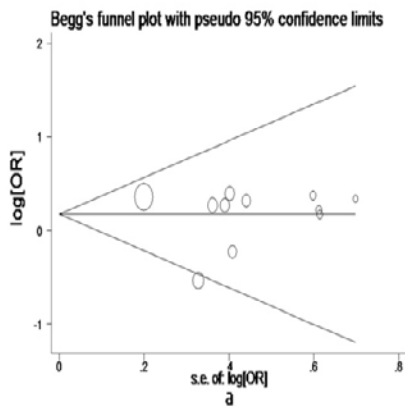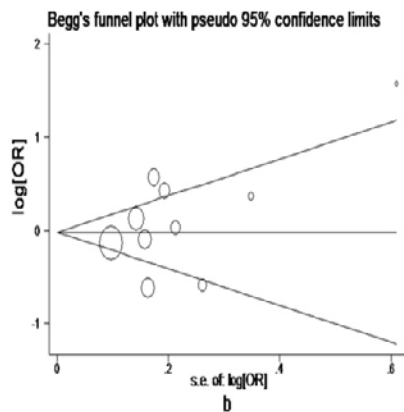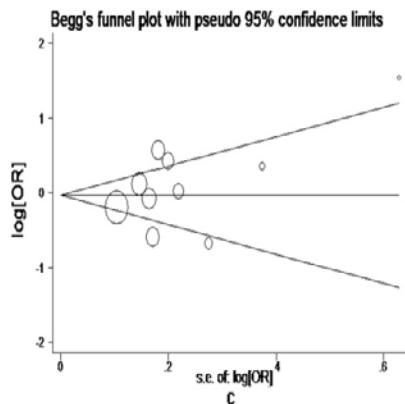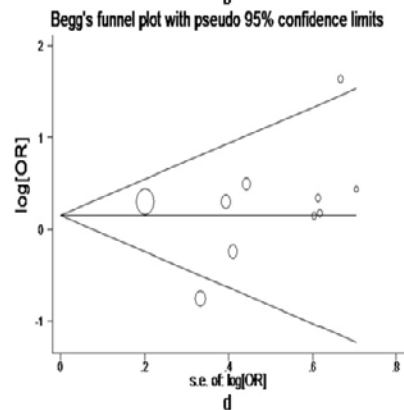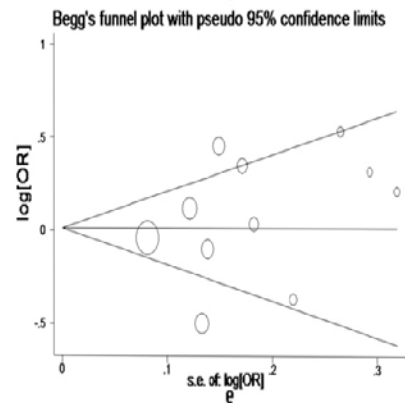

Figure S5 Begg's funnel plots of publication bias for all studies  
a, recessive model; b, dominant model; c, codominant (GC vs. CC); d, codominant (GG vs. CC); e, allele model.
